# Supplementary material for: Probing language identity encoded in pre-trained multilingual models: a typological view
Source: PeerJ journal article supplement (doi:10.7717/peerj-cs.899), 2022-03-15
Supplement: Raw_data_or_code_files.zip [file Raw_data_or_code_files.zip]

## Sheet: Sheet1
	Order of Pronominal Possessor and Noun	Complementizer Clause	A noun phase containing Num (N Num or Num N) in a definite context haswhar	Order of Noun, Adjective and Demonstrative	Order of Noun, Numeral and Demonstrative	indefinite mass	definite mass	definite singular	definite plural	Polar question by what	Affirmative answer by what	NEGA_Negative answer by what
Albanian	22_N Pron.Poss	C 01_C Clause	N2 F3_Def NumN or NNum can be bare	N3 02_Dem N A	N3 11_Num Dem N	O 01 1_Indef Mass_Can be bare				Q05_Polar question by V-fronting	Q12_Affirmative answer by particle and verb	Q18_NEGA_Neg answer by sentential neg plus bare verb
Basque				N3 06_A N Dem		O 01 3_Indef_Mass_Must have an article	O 02 3_Def_Mass _Must have an article	O 04 3_Def_Sg_Must have an article	O 06 3_Def_Pl_Must have an article
Breton		C 01_C Clause		N3 03_ N A Dem
Bulgarian	21_Pron.Poss N	C 01_C Clause	N2 F2_Def NumN or NNum can have a DEM?	N3 01_ Dem A N
Burmese	21_Pron.Poss N	C 02_Clause C	N2 F3_Def NumN or NNum can be bare	N3 01_ Dem A N	N3 08_Dem N Num						Q12_Affirmative answer by particle and verb
Catalan	22_N Pron.Poss	C 01_C Clause	N2 F2_Def NumN or NNum can have a DEM?	N3 02_Dem N A	N3 12_Num N Dem	O 01 1_Indef Mass_Can be bare	O 02 3_Def_Mass _Must have an article	O 04 3_Def_Sg_Must have an article	O 06 3_Def_Pl_Must have an article	Q06_Polar question by Aux-fronting	Q08_Affirmative answer by particle	Q17_NEGA_Neg answer by bare sentential negation
Chinese	21_Pron.Poss N		N2 F2_Def NumN or NNum can have a DEM?	N3 05_A Dem N	N3 07_Dem Num N	O 01 2_Indef_Mass_Can have an article	O 02 1_Def_Mass _Can be bare	O 04 2_Def_Sg_Can have an article	O 06 1_Def_Pl_Can be bare		Q11_Affirmative answer by auxiliary and verb	Q18_NEGA_Neg answer by sentential neg plus bare verb
Czech	21_Pron.Poss N	C 01_C Clause	N2 F2_Def NumN or NNum can have a DEM?	N3 01_ Dem A N	N3 07_Dem Num N					Q06_Polar question by Aux-fronting	Q10_Affirmative answer by aux
Danish	21_Pron.Poss N	C 01_C Clause	N2 F2_Def NumN or NNum can have a DEM?	N3 01_ Dem A N	N3 07_Dem Num N	O 01 1_Indef Mass_Can be bare	O 02 3_Def_Mass _Must have an article	O 04 3_Def_Sg_Must have an article	O 06 3_Def_Pl_Must have an article	Q06_Polar question by Aux-fronting	Q08_Affirmative answer by particle	Q16_NEGA_Negative answer by special neg particle
Dutch	22_N Pron.Poss	C 01_C Clause	N2 F2_Def NumN or NNum can have a DEM?	N3 01_ Dem A N	N3 07_Dem Num N	O 01 1_Indef Mass_Can be bare	O 02 3_Def_Mass _Must have an article	O 04 3_Def_Sg_Must have an article	O 06 3_Def_Pl_Must have an article	Q06_Polar question by Aux-fronting	Q08_Affirmative answer by particle	Q16_NEGA_Negative answer by special neg particle
English	21_Pron.Poss N	C 01_C Clause	N2 F2_Def NumN or NNum can have a DEM?	N3 02_Dem N A	N3 07_Dem Num N	O 01 1_Indef Mass_Can be bare	O 02 3_Def_Mass _Must have an article	O 04 3_Def_Sg_Must have an article	O 06 3_Def_Pl_Must have an article	Q06_Polar question by Aux-fronting	Q08_Affirmative answer by particle	Q16_NEGA_Negative answer by special neg particle
Estonian	21_Pron.Poss N	C 01_C Clause	N2 F2_Def NumN or NNum can have a DEM?			O 01 1_Indef Mass_Can be bare	O 02 3_Def_Mass _Must have an article	O 04 1_Def_Sg_Can be bare	O 06 1_Def_Pl_Can be bare
French	21_Pron.Poss N	C 01_C Clause	N2 F2_Def NumN or NNum can have a DEM?	N3 02_Dem N A	N3 07_Dem Num N	O 01 3_Indef_Mass_Must have an article	O 02 3_Def_Mass _Must have an article	O 04 3_Def_Sg_Must have an article	O 06 3_Def_Pl_Must have an article	Q06_Polar question by Aux-fronting	Q08_Affirmative answer by particle	Q16_NEGA_Negative answer by special neg particle
Greek (Modern)	22_N Pron.Poss	C 01_C Clause	N2 F2_Def NumN or NNum can have a DEM?	N3 06_A N Dem	N3 12_Num N Dem	O 01 1_Indef Mass_Can be bare	O 02 3_Def_Mass _Must have an article	O 04 3_Def_Sg_Must have an article	O 06 3_Def_Pl_Must have an article	Q06_Polar question by Aux-fronting	Q11_Affirmative answer by auxiliary and verb	Q18_NEGA_Neg answer by sentential neg plus bare verb
Hebrew	22_N Pron.Poss	C 01_C Clause	N2 F2_Def NumN or NNum can have a DEM?	N3 03_ N A Dem	N3 12_Num N Dem	O 01 1_Indef Mass_Can be bare	O 02 3_Def_Mass _Must have an article	O 04 3_Def_Sg_Must have an article	O 06 3_Def_Pl_Must have an article	Q04_Polar question by intonation	Q12_Affirmative answer by particle and verb	Q17_NEGA_Neg answer by bare sentential negation
Hindi	21_Pron.Poss N	C 01_C Clause	N2 F2_Def NumN or NNum can have a DEM?	N3 01_ Dem A N	N3 07_Dem Num N					Q04_Polar question by intonation
Hungarian	21_Pron.Poss N	C 02_Clause C	N2 F2_Def NumN or NNum can have a DEM?	N3 01_ Dem A N	N3 07_Dem Num N	O 01 1_Indef Mass_Can be bare	O 02 3_Def_Mass _Must have an article	O 04 3_Def_Sg_Must have an article	O 06 3_Def_Pl_Must have an article	Q04_Polar question by intonation	Q12_Affirmative answer by particle and verb	Q18_NEGA_Neg answer by sentential neg plus bare verb
Icelandic	22_N Pron.Poss	C 01_C Clause	N2 F2_Def NumN or NNum can have a DEM?	N3 01_ Dem A N	N3 07_Dem Num N					Q06_Polar question by Aux-fronting	Q08_Affirmative answer by particle	Q16_NEGA_Negative answer by special neg particle
Indonesian	22_N Pron.Poss	C 01_C Clause		N3 03_ N A Dem	N3 09_ N Num Dem					Q04_Polar question by intonation	Q09_Affirmative answer by V
Irish		C 01_C Clause
Italian	21_Pron.Poss N	C 01_C Clause	N2 F2_Def NumN or NNum can have a DEM?	N3 02_Dem N A	N3 07_Dem Num N	O 01 2_Indef_Mass_Can have an article	O 02 3_Def_Mass _Must have an article	O 04 3_Def_Sg_Must have an article	O 06 3_Def_Pl_Must have an article	Q04_Polar question by intonation	Q08_Affirmative answer by particle	Q16_NEGA_Negative answer by special neg particle
Japanese	21_Pron.Poss N	C 02_Clause C	N2 F3_Def NumN or NNum can be bare	N3 05_A Dem N	N3 11_Num Dem N	O 01 1_Indef Mass_Can be bare	O 02 1_Def_Mass _Can be bare	O 04 2_Def_Sg_Can have an article	O 06 2_Def_Pl_Can have an article	Q04_Polar question by intonation	Q12_Affirmative answer by particle and verb	Q18_NEGA_Neg answer by sentential neg plus bare verb
Kannada	21_Pron.Poss N					O 01 1_Indef Mass_Can be bare	O 02 3_Def_Mass _Must have an article	O 04 3_Def_Sg_Must have an article	O 06 3_Def_Pl_Must have an article
Korean	21_Pron.Poss N	C 02_Clause C	N2 F2_Def NumN or NNum can have a DEM?	N3 05_A Dem N	N3 11_Num Dem N	O 01 1_Indef Mass_Can be bare	O 02 1_Def_Mass _Can be bare	O 04 1_Def_Sg_Can be bare	O 06 1_Def_Pl_Can be bare	Q04_Polar question by intonation	Q12_Affirmative answer by particle and verb	Q18_NEGA_Neg answer by sentential neg plus bare verb
Lithuanian	21_Pron.Poss N	C 01_C Clause		N3 01_ Dem A N	N3 07_Dem Num N						Q12_Affirmative answer by particle and verb
Malagasy	22_N Pron.Poss	C 01_C Clause	N2 F2_Def NumN or NNum can have a DEM?	N3 03_ N A Dem	N3 09_ N Num Dem	O 01 1_Indef Mass_Can be bare	O 02 3_Def_Mass _Must have an article	O 04 3_Def_Sg_Must have an article	O 06 3_Def_Pl_Must have an article		Q08_Affirmative answer by particle	Q16_NEGA_Negative answer by special neg particle
Nepali	21_Pron.Poss N	C 01_C Clause	N2 F2_Def NumN or NNum can have a DEM?	N3 01_ Dem A N	N3 07_Dem Num N					Q04_Polar question by intonation	Q12_Affirmative answer by particle and verb
Norwegian	22_N Pron.Poss	C 01_C Clause	N2 F2_Def NumN or NNum can have a DEM?	N3 01_ Dem A N	N3 07_Dem Num N	O 01 1_Indef Mass_Can be bare	O 02 3_Def_Mass _Must have an article	O 04 3_Def_Sg_Must have an article	O 06 3_Def_Pl_Must have an article	Q06_Polar question by Aux-fronting	Q08_Affirmative answer by particle	Q16_NEGA_Negative answer by special neg particle
Polish	22_N Pron.Poss	C 01_C Clause	N2 F2_Def NumN or NNum can have a DEM?	N3 04_N Dem A	N3 11_Num Dem N					Q06_Polar question by Aux-fronting	Q12_Affirmative answer by particle and verb
Portuguese	22_N Pron.Poss	C 01_C Clause	N2 F2_Def NumN or NNum can have a DEM?	N3 02_Dem N A	N3 07_Dem Num N	O 01 1_Indef Mass_Can be bare	O 02 3_Def_Mass _Must have an article	O 04 3_Def_Sg_Must have an article	O 06 3_Def_Pl_Must have an article	Q04_Polar question by intonation	Q10_Affirmative answer by aux	Q18_NEGA_Neg answer by sentential neg plus bare verb
Romanian	22_N Pron.Poss	C 01_C Clause	N2 F2_Def NumN or NNum can have a DEM?	N3 04_N Dem A	N3 10_N Dem Num	O 01 2_Indef_Mass_Can have an article	O 02 3_Def_Mass _Must have an article	O 04 3_Def_Sg_Must have an article	O 06 3_Def_Pl_Must have an article	Q06_Polar question by Aux-fronting	Q11_Affirmative answer by auxiliary and verb	Q18_NEGA_Neg answer by sentential neg plus bare verb
Russian	22_N Pron.Poss	C 01_C Clause	N2 F2_Def NumN or NNum can have a DEM?	N3 01_ Dem A N	N3 12_Num N Dem	O 01 2_Indef_Mass_Can have an article	O 02 1_Def_Mass _Can be bare	O 04 1_Def_Sg_Can be bare	O 06 1_Def_Pl_Can be bare	Q06_Polar question by Aux-fronting	Q12_Affirmative answer by particle and verb	Q18_NEGA_Neg answer by sentential neg plus bare verb
Serbian	21_Pron.Poss N	C 01_C Clause	N2 F3_Def NumN or NNum can be bare	N3 01_ Dem A N	N3 11_Num Dem N	O 01 1_Indef Mass_Can be bare	O 02 1_Def_Mass _Can be bare	O 04 1_Def_Sg_Can be bare	O 06 1_Def_Pl_Can be bare	Q06_Polar question by Aux-fronting	Q10_Affirmative answer by aux	Q18_NEGA_Neg answer by sentential neg plus bare verb
Spanish	22_N Pron.Poss	C 01_C Clause	N2 F2_Def NumN or NNum can have a DEM?	N3 02_Dem N A	N3 12_Num N Dem	O 01 1_Indef Mass_Can be bare	O 02 3_Def_Mass _Must have an article	O 04 3_Def_Sg_Must have an article	O 06 3_Def_Pl_Must have an article	Q06_Polar question by Aux-fronting	Q08_Affirmative answer by particle	Q17_NEGA_Neg answer by bare sentential negation
Swedish	21_Pron.Poss N	C 01_C Clause	N2 F2_Def NumN or NNum can have a DEM?	N3 01_ Dem A N	N3 07_Dem Num N	O 01 1_Indef Mass_Can be bare	O 02 3_Def_Mass _Must have an article	O 04 3_Def_Sg_Must have an article	O 06 3_Def_Pl_Must have an article	Q06_Polar question by Aux-fronting	Q08_Affirmative answer by particle	Q16_NEGA_Negative answer by special neg particle
Tagalog	22_N Pron.Poss	C 01_C Clause	N2 F3_Def NumN or NNum can be bare	N3 06_A N Dem	N3 12_Num N Dem						Q12_Affirmative answer by particle and verb
Turkish	22_N Pron.Poss		N2 F2_Def NumN or NNum can have a DEM?	N3 01_ Dem A N	N3 07_Dem Num N	O 01 1_Indef Mass_Can be bare	O 02 3_Def_Mass _Must have an article	O 04 3_Def_Sg_Must have an article	O 06 3_Def_Pl_Must have an article	Q04_Polar question by intonation	Q12_Affirmative answer by particle and verb	Q18_NEGA_Neg answer by sentential neg plus bare verb
Ukrainian	21_Pron.Poss N	C 01_C Clause	N2 F3_Def NumN or NNum can be bare	N3 01_ Dem A N	N3 11_Num Dem N
Vietnamese	22_N Pron.Poss	C 01_C Clause	N2 F3_Def NumN or NNum can be bare	N3 03_ N A Dem	N3 12_Num N Dem	O 01 1_Indef Mass_Can be bare	O 02 1_Def_Mass _Can be bare	O 04 1_Def_Sg_Can be bare	O 06 1_Def_Pl_Can be bare		Q08_Affirmative answer by particle	Q17_NEGA_Neg answer by bare sentential negation
Welsh	22_N Pron.Poss	C 01_C Clause

## Sheet: Sheet2
	Danish
	21_Pron.Poss N
	C 01_C Clause
	N2 F2_Def NumN or NNum can have a DEM?
	N3 01_ Dem A N
	N3 07_Dem Num N
	O 01 1_Indef Mass_Can be bare
	O 02 3_Def_Mass _Must have an article
	O 04 3_Def_Sg_Must have an article
	O 06 3_Def_Pl_Must have an article
	Q06_Polar question by Aux-fronting
	Q08_Affirmative answer by particle
	Q16_NEGA_Negative answer by special neg particle
	Danish
	21_Pron.Poss N
	C 01_C Clause
	N2 F2_Def NumN or NNum can have a DEM?
	N3 01_ Dem A N
	N3 07_Dem Num N
	O 01 1_Indef Mass_Can be bare
	O 02 3_Def_Mass _Must have an article
	O 04 3_Def_Sg_Must have an article
	O 06 3_Def_Pl_Must have an article
	Q06_Polar question by Aux-fronting
	Q08_Affirmative answer by particle
	Q16_NEGA_Negative answer by special neg particle
	Danish
	21_Pron.Poss N
	C 01_C Clause
	N2 F2_Def NumN or NNum can have a DEM?
	N3 01_ Dem A N
	N3 07_Dem Num N
	O 01 1_Indef Mass_Can be bare
	O 02 3_Def_Mass _Must have an article
	O 04 3_Def_Sg_Must have an article
	O 06 3_Def_Pl_Must have an article
	Q06_Polar question by Aux-fronting
	Q08_Affirmative answer by particle
	Q16_NEGA_Negative answer by special neg particle
	Danish
	21_Pron.Poss N
	C 01_C Clause
	N2 F2_Def NumN or NNum can have a DEM?
	N3 01_ Dem A N
	N3 07_Dem Num N
	O 01 1_Indef Mass_Can be bare
	O 02 3_Def_Mass _Must have an article
	O 04 3_Def_Sg_Must have an article
	O 06 3_Def_Pl_Must have an article
	Q06_Polar question by Aux-fronting
	Q08_Affirmative answer by particle
	Q16_NEGA_Negative answer by special neg particle
	Danish
	21_Pron.Poss N
	C 01_C Clause
	N2 F2_Def NumN or NNum can have a DEM?
	N3 01_ Dem A N
	N3 07_Dem Num N
	O 01 1_Indef Mass_Can be bare
	O 02 3_Def_Mass _Must have an article
	O 04 3_Def_Sg_Must have an article
	O 06 3_Def_Pl_Must have an article
	Q06_Polar question by Aux-fronting
	Q08_Affirmative answer by particle
	Q16_NEGA_Negative answer by special neg particle
	Danish
	21_Pron.Poss N
	C 01_C Clause
	N2 F2_Def NumN or NNum can have a DEM?
	N3 01_ Dem A N
	N3 07_Dem Num N
	O 01 1_Indef Mass_Can be bare
	O 02 3_Def_Mass _Must have an article
	O 04 3_Def_Sg_Must have an article
	O 06 3_Def_Pl_Must have an article
	Q06_Polar question by Aux-fronting
	Q08_Affirmative answer by particle
	Q16_NEGA_Negative answer by special neg particle
	Danish
	21_Pron.Poss N
	C 01_C Clause
	N2 F2_Def NumN or NNum can have a DEM?
	N3 01_ Dem A N
	N3 07_Dem Num N
	O 01 1_Indef Mass_Can be bare
	O 02 3_Def_Mass _Must have an article
	O 04 3_Def_Sg_Must have an article
	O 06 3_Def_Pl_Must have an article
	Q06_Polar question by Aux-fronting
	Q08_Affirmative answer by particle
	Q16_NEGA_Negative answer by special neg particle
	Danish
	21_Pron.Poss N
	C 01_C Clause
	N2 F2_Def NumN or NNum can have a DEM?
	N3 01_ Dem A N
	N3 07_Dem Num N
	O 01 1_Indef Mass_Can be bare
	O 02 3_Def_Mass _Must have an article
	O 04 3_Def_Sg_Must have an article
	O 06 3_Def_Pl_Must have an article
	Q06_Polar question by Aux-fronting
	Q08_Affirmative answer by particle
	Q16_NEGA_Negative answer by special neg particle
	Danish
	21_Pron.Poss N
	C 01_C Clause
	N2 F2_Def NumN or NNum can have a DEM?
	N3 01_ Dem A N
	N3 07_Dem Num N
	O 01 1_Indef Mass_Can be bare
	O 02 3_Def_Mass _Must have an article
	O 04 3_Def_Sg_Must have an article
	O 06 3_Def_Pl_Must have an article
	Q06_Polar question by Aux-fronting
	Q08_Affirmative answer by particle
	Q16_NEGA_Negative answer by special neg particle
	Danish
	21_Pron.Poss N
	C 01_C Clause
	N2 F2_Def NumN or NNum can have a DEM?
	N3 01_ Dem A N
	N3 07_Dem Num N
	O 01 1_Indef Mass_Can be bare
	O 02 3_Def_Mass _Must have an article
	O 04 3_Def_Sg_Must have an article
	O 06 3_Def_Pl_Must have an article
	Q06_Polar question by Aux-fronting
	Q08_Affirmative answer by particle
	Q16_NEGA_Negative answer by special neg particle
	Danish
	21_Pron.Poss N
	C 01_C Clause
	N2 F2_Def NumN or NNum can have a DEM?
	N3 01_ Dem A N
	N3 07_Dem Num N
	O 01 1_Indef Mass_Can be bare
	O 02 3_Def_Mass _Must have an article
	O 04 3_Def_Sg_Must have an article
	O 06 3_Def_Pl_Must have an article
	Q06_Polar question by Aux-fronting
	Q08_Affirmative answer by particle
	Q16_NEGA_Negative answer by special neg particle
	Danish
	21_Pron.Poss N
	C 01_C Clause
	N2 F2_Def NumN or NNum can have a DEM?
	N3 01_ Dem A N
	N3 07_Dem Num N
	O 01 1_Indef Mass_Can be bare
	O 02 3_Def_Mass _Must have an article
	O 04 3_Def_Sg_Must have an article
	O 06 3_Def_Pl_Must have an article
	Q06_Polar question by Aux-fronting
	Q08_Affirmative answer by particle
	Q16_NEGA_Negative answer by special neg particle
	Danish
	21_Pron.Poss N
	C 01_C Clause
	N2 F2_Def NumN or NNum can have a DEM?
	N3 01_ Dem A N
	N3 07_Dem Num N
	O 01 1_Indef Mass_Can be bare
	O 02 3_Def_Mass _Must have an article
	O 04 3_Def_Sg_Must have an article
	O 06 3_Def_Pl_Must have an article
	Q06_Polar question by Aux-fronting
	Q08_Affirmative answer by particle
	Q16_NEGA_Negative answer by special neg particle
	Danish
	21_Pron.Poss N
	C 01_C Clause
	N2 F2_Def NumN or NNum can have a DEM?
	N3 01_ Dem A N
	N3 07_Dem Num N
	O 01 1_Indef Mass_Can be bare
	O 02 3_Def_Mass _Must have an article
	O 04 3_Def_Sg_Must have an article
	O 06 3_Def_Pl_Must have an article
	Q06_Polar question by Aux-fronting
	Q08_Affirmative answer by particle
	Q16_NEGA_Negative answer by special neg particle
	Danish
	21_Pron.Poss N
	C 01_C Clause
	N2 F2_Def NumN or NNum can have a DEM?
	N3 01_ Dem A N
	N3 07_Dem Num N
	O 01 1_Indef Mass_Can be bare
	O 02 3_Def_Mass _Must have an article
	O 04 3_Def_Sg_Must have an article
	O 06 3_Def_Pl_Must have an article
	Q06_Polar question by Aux-fronting
	Q08_Affirmative answer by particle
	Q16_NEGA_Negative answer by special neg particle
	Danish
	21_Pron.Poss N
	C 01_C Clause
	N2 F2_Def NumN or NNum can have a DEM?
	N3 01_ Dem A N
	N3 07_Dem Num N
	O 01 1_Indef Mass_Can be bare
	O 02 3_Def_Mass _Must have an article
	O 04 3_Def_Sg_Must have an article
	O 06 3_Def_Pl_Must have an article
	Q06_Polar question by Aux-fronting
	Q08_Affirmative answer by particle
	Q16_NEGA_Negative answer by special neg particle
	Danish
	21_Pron.Poss N
	C 01_C Clause
	N2 F2_Def NumN or NNum can have a DEM?
	N3 01_ Dem A N
	N3 07_Dem Num N
	O 01 1_Indef Mass_Can be bare
	O 02 3_Def_Mass _Must have an article
	O 04 3_Def_Sg_Must have an article
	O 06 3_Def_Pl_Must have an article
	Q06_Polar question by Aux-fronting
	Q08_Affirmative answer by particle
	Q16_NEGA_Negative answer by special neg particle
	Danish
	21_Pron.Poss N
	C 01_C Clause
	N2 F2_Def NumN or NNum can have a DEM?
	N3 01_ Dem A N
	N3 07_Dem Num N
	O 01 1_Indef Mass_Can be bare
	O 02 3_Def_Mass _Must have an article
	O 04 3_Def_Sg_Must have an article
	O 06 3_Def_Pl_Must have an article
	Q06_Polar question by Aux-fronting
	Q08_Affirmative answer by particle
	Q16_NEGA_Negative answer by special neg particle
	Danish
	21_Pron.Poss N
	C 01_C Clause
	N2 F2_Def NumN or NNum can have a DEM?
	N3 01_ Dem A N
	N3 07_Dem Num N
	O 01 1_Indef Mass_Can be bare
	O 02 3_Def_Mass _Must have an article
	O 04 3_Def_Sg_Must have an article
	O 06 3_Def_Pl_Must have an article
	Q06_Polar question by Aux-fronting
	Q08_Affirmative answer by particle
	Q16_NEGA_Negative answer by special neg particle
	Danish
	21_Pron.Poss N
	C 01_C Clause
	N2 F2_Def NumN or NNum can have a DEM?
	N3 01_ Dem A N
	N3 07_Dem Num N
	O 01 1_Indef Mass_Can be bare
	O 02 3_Def_Mass _Must have an article
	O 04 3_Def_Sg_Must have an article
	O 06 3_Def_Pl_Must have an article
	Q06_Polar question by Aux-fronting
	Q08_Affirmative answer by particle
	Q16_NEGA_Negative answer by special neg particle
	Danish
	21_Pron.Poss N
	C 01_C Clause
	N2 F2_Def NumN or NNum can have a DEM?
	N3 01_ Dem A N
	N3 07_Dem Num N
	O 01 1_Indef Mass_Can be bare
	O 02 3_Def_Mass _Must have an article
	O 04 3_Def_Sg_Must have an article
	O 06 3_Def_Pl_Must have an article
	Q06_Polar question by Aux-fronting
	Q08_Affirmative answer by particle
	Q16_NEGA_Negative answer by special neg particle
	Danish
	21_Pron.Poss N
	C 01_C Clause
	N2 F2_Def NumN or NNum can have a DEM?
	N3 01_ Dem A N
	N3 07_Dem Num N
	O 01 1_Indef Mass_Can be bare
	O 02 3_Def_Mass _Must have an article
	O 04 3_Def_Sg_Must have an article
	O 06 3_Def_Pl_Must have an article
	Q06_Polar question by Aux-fronting
	Q08_Affirmative answer by particle
	Q16_NEGA_Negative answer by special neg particle
	Danish
	21_Pron.Poss N
	C 01_C Clause
	N2 F2_Def NumN or NNum can have a DEM?
	N3 01_ Dem A N
	N3 07_Dem Num N
	O 01 1_Indef Mass_Can be bare
	O 02 3_Def_Mass _Must have an article
	O 04 3_Def_Sg_Must have an article
	O 06 3_Def_Pl_Must have an article
	Q06_Polar question by Aux-fronting
	Q08_Affirmative answer by particle
	Q16_NEGA_Negative answer by special neg particle
	Danish
	21_Pron.Poss N
	C 01_C Clause
	N2 F2_Def NumN or NNum can have a DEM?
	N3 01_ Dem A N
	N3 07_Dem Num N
	O 01 1_Indef Mass_Can be bare
	O 02 3_Def_Mass _Must have an article
	O 04 3_Def_Sg_Must have an article
	O 06 3_Def_Pl_Must have an article
	Q06_Polar question by Aux-fronting
	Q08_Affirmative answer by particle
	Q16_NEGA_Negative answer by special neg particle
	Danish
	21_Pron.Poss N
	C 01_C Clause
	N2 F2_Def NumN or NNum can have a DEM?
	N3 01_ Dem A N
	N3 07_Dem Num N
	O 01 1_Indef Mass_Can be bare
	O 02 3_Def_Mass _Must have an article
	O 04 3_Def_Sg_Must have an article
	O 06 3_Def_Pl_Must have an article
	Q06_Polar question by Aux-fronting
	Q08_Affirmative answer by particle
	Q16_NEGA_Negative answer by special neg particle
	Danish
	21_Pron.Poss N
	C 01_C Clause
	N2 F2_Def NumN or NNum can have a DEM?
	N3 01_ Dem A N
	N3 07_Dem Num N
	O 01 1_Indef Mass_Can be bare
	O 02 3_Def_Mass _Must have an article
	O 04 3_Def_Sg_Must have an article
	O 06 3_Def_Pl_Must have an article
	Q06_Polar question by Aux-fronting
	Q08_Affirmative answer by particle
	Q16_NEGA_Negative answer by special neg particle
	Danish
	21_Pron.Poss N
	C 01_C Clause
	N2 F2_Def NumN or NNum can have a DEM?
	N3 01_ Dem A N
	N3 07_Dem Num N
	O 01 1_Indef Mass_Can be bare
	O 02 3_Def_Mass _Must have an article
	O 04 3_Def_Sg_Must have an article
	O 06 3_Def_Pl_Must have an article
	Q06_Polar question by Aux-fronting
	Q08_Affirmative answer by particle
	Q16_NEGA_Negative answer by special neg particle
	Danish
	21_Pron.Poss N
	C 01_C Clause
	N2 F2_Def NumN or NNum can have a DEM?
	N3 01_ Dem A N
	N3 07_Dem Num N
	O 01 1_Indef Mass_Can be bare
	O 02 3_Def_Mass _Must have an article
	O 04 3_Def_Sg_Must have an article
	O 06 3_Def_Pl_Must have an article
	Q06_Polar question by Aux-fronting
	Q08_Affirmative answer by particle
	Q16_NEGA_Negative answer by special neg particle
	Danish
	21_Pron.Poss N
	C 01_C Clause
	N2 F2_Def NumN or NNum can have a DEM?
	N3 01_ Dem A N
	N3 07_Dem Num N
	O 01 1_Indef Mass_Can be bare
	O 02 3_Def_Mass _Must have an article
	O 04 3_Def_Sg_Must have an article
	O 06 3_Def_Pl_Must have an article
	Q06_Polar question by Aux-fronting
	Q08_Affirmative answer by particle
	Q16_NEGA_Negative answer by special neg particle
	Danish
	21_Pron.Poss N
	C 01_C Clause
	N2 F2_Def NumN or NNum can have a DEM?
	N3 01_ Dem A N
	N3 07_Dem Num N
	O 01 1_Indef Mass_Can be bare
	O 02 3_Def_Mass _Must have an article
	O 04 3_Def_Sg_Must have an article
	O 06 3_Def_Pl_Must have an article
	Q06_Polar question by Aux-fronting
	Q08_Affirmative answer by particle
	Q16_NEGA_Negative answer by special neg particle
	Danish
	21_Pron.Poss N
	C 01_C Clause
	N2 F2_Def NumN or NNum can have a DEM?
	N3 01_ Dem A N
	N3 07_Dem Num N
	O 01 1_Indef Mass_Can be bare
	O 02 3_Def_Mass _Must have an article
	O 04 3_Def_Sg_Must have an article
	O 06 3_Def_Pl_Must have an article
	Q06_Polar question by Aux-fronting
	Q08_Affirmative answer by particle
	Q16_NEGA_Negative answer by special neg particle
	Danish
	21_Pron.Poss N
	C 01_C Clause
	N2 F2_Def NumN or NNum can have a DEM?
	N3 01_ Dem A N
	N3 07_Dem Num N
	O 01 1_Indef Mass_Can be bare
	O 02 3_Def_Mass _Must have an article
	O 04 3_Def_Sg_Must have an article
	O 06 3_Def_Pl_Must have an article
	Q06_Polar question by Aux-fronting
	Q08_Affirmative answer by particle
	Q16_NEGA_Negative answer by special neg particle
	Danish
	21_Pron.Poss N
	C 01_C Clause
	N2 F2_Def NumN or NNum can have a DEM?
	N3 01_ Dem A N
	N3 07_Dem Num N
	O 01 1_Indef Mass_Can be bare
	O 02 3_Def_Mass _Must have an article
	O 04 3_Def_Sg_Must have an article
	O 06 3_Def_Pl_Must have an article
	Q06_Polar question by Aux-fronting
	Q08_Affirmative answer by particle
	Q16_NEGA_Negative answer by special neg particle
	Danish
	21_Pron.Poss N
	C 01_C Clause
	N2 F2_Def NumN or NNum can have a DEM?
	N3 01_ Dem A N
	N3 07_Dem Num N
	O 01 1_Indef Mass_Can be bare
	O 02 3_Def_Mass _Must have an article
	O 04 3_Def_Sg_Must have an article
	O 06 3_Def_Pl_Must have an article
	Q06_Polar question by Aux-fronting
	Q08_Affirmative answer by particle
	Q16_NEGA_Negative answer by special neg particle
	Danish
	21_Pron.Poss N
	C 01_C Clause
	N2 F2_Def NumN or NNum can have a DEM?
	N3 01_ Dem A N
	N3 07_Dem Num N
	O 01 1_Indef Mass_Can be bare
	O 02 3_Def_Mass _Must have an article
	O 04 3_Def_Sg_Must have an article
	O 06 3_Def_Pl_Must have an article
	Q06_Polar question by Aux-fronting
	Q08_Affirmative answer by particle
	Q16_NEGA_Negative answer by special neg particle
	Danish
	21_Pron.Poss N
	C 01_C Clause
	N2 F2_Def NumN or NNum can have a DEM?
	N3 01_ Dem A N
	N3 07_Dem Num N
	O 01 1_Indef Mass_Can be bare
	O 02 3_Def_Mass _Must have an article
	O 04 3_Def_Sg_Must have an article
	O 06 3_Def_Pl_Must have an article
	Q06_Polar question by Aux-fronting
	Q08_Affirmative answer by particle
	Q16_NEGA_Negative answer by special neg particle
	Danish
	21_Pron.Poss N
	C 01_C Clause
	N2 F2_Def NumN or NNum can have a DEM?
	N3 01_ Dem A N
	N3 07_Dem Num N
	O 01 1_Indef Mass_Can be bare
	O 02 3_Def_Mass _Must have an article
	O 04 3_Def_Sg_Must have an article
	O 06 3_Def_Pl_Must have an article
	Q06_Polar question by Aux-fronting
	Q08_Affirmative answer by particle
	Q16_NEGA_Negative answer by special neg particle
	Danish
	21_Pron.Poss N
	C 01_C Clause
	N2 F2_Def NumN or NNum can have a DEM?
	N3 01_ Dem A N
	N3 07_Dem Num N
	O 01 1_Indef Mass_Can be bare
	O 02 3_Def_Mass _Must have an article
	O 04 3_Def_Sg_Must have an article
	O 06 3_Def_Pl_Must have an article
	Q06_Polar question by Aux-fronting
	Q08_Affirmative answer by particle
	Q16_NEGA_Negative answer by special neg particle
	Danish
	21_Pron.Poss N
	C 01_C Clause
	N2 F2_Def NumN or NNum can have a DEM?
	N3 01_ Dem A N
	N3 07_Dem Num N
	O 01 1_Indef Mass_Can be bare
	O 02 3_Def_Mass _Must have an article
	O 04 3_Def_Sg_Must have an article
	O 06 3_Def_Pl_Must have an article
	Q06_Polar question by Aux-fronting
	Q08_Affirmative answer by particle
	Q16_NEGA_Negative answer by special neg particle
	Danish
	21_Pron.Poss N
	C 01_C Clause
	N2 F2_Def NumN or NNum can have a DEM?
	N3 01_ Dem A N
	N3 07_Dem Num N
	O 01 1_Indef Mass_Can be bare
	O 02 3_Def_Mass _Must have an article
	O 04 3_Def_Sg_Must have an article
	O 06 3_Def_Pl_Must have an article
	Q06_Polar question by Aux-fronting
	Q08_Affirmative answer by particle
	Q16_NEGA_Negative answer by special neg particle
	Danish
	21_Pron.Poss N
	C 01_C Clause
	N2 F2_Def NumN or NNum can have a DEM?
	N3 01_ Dem A N
	N3 07_Dem Num N
	O 01 1_Indef Mass_Can be bare
	O 02 3_Def_Mass _Must have an article
	O 04 3_Def_Sg_Must have an article
	O 06 3_Def_Pl_Must have an article
	Q06_Polar question by Aux-fronting
	Q08_Affirmative answer by particle
	Q16_NEGA_Negative answer by special neg particle
	Danish
	21_Pron.Poss N
	C 01_C Clause
	N2 F2_Def NumN or NNum can have a DEM?
	N3 01_ Dem A N
	N3 07_Dem Num N
	O 01 1_Indef Mass_Can be bare
	O 02 3_Def_Mass _Must have an article
	O 04 3_Def_Sg_Must have an article
	O 06 3_Def_Pl_Must have an article
	Q06_Polar question by Aux-fronting
	Q08_Affirmative answer by particle
	Q16_NEGA_Negative answer by special neg particle
	Danish
	21_Pron.Poss N
	C 01_C Clause
	N2 F2_Def NumN or NNum can have a DEM?
	N3 01_ Dem A N
	N3 07_Dem Num N
	O 01 1_Indef Mass_Can be bare
	O 02 3_Def_Mass _Must have an article
	O 04 3_Def_Sg_Must have an article
	O 06 3_Def_Pl_Must have an article
	Q06_Polar question by Aux-fronting
	Q08_Affirmative answer by particle
	Q16_NEGA_Negative answer by special neg particle
	Danish
	21_Pron.Poss N
	C 01_C Clause
	N2 F2_Def NumN or NNum can have a DEM?
	N3 01_ Dem A N
	N3 07_Dem Num N
	O 01 1_Indef Mass_Can be bare
	O 02 3_Def_Mass _Must have an article
	O 04 3_Def_Sg_Must have an article
	O 06 3_Def_Pl_Must have an article
	Q06_Polar question by Aux-fronting
	Q08_Affirmative answer by particle
	Q16_NEGA_Negative answer by special neg particle
	Danish
	21_Pron.Poss N
	C 01_C Clause
	N2 F2_Def NumN or NNum can have a DEM?
	N3 01_ Dem A N
	N3 07_Dem Num N
	O 01 1_Indef Mass_Can be bare
	O 02 3_Def_Mass _Must have an article
	O 04 3_Def_Sg_Must have an article
	O 06 3_Def_Pl_Must have an article
	Q06_Polar question by Aux-fronting
	Q08_Affirmative answer by particle
	Q16_NEGA_Negative answer by special neg particle
	Danish
	21_Pron.Poss N
	C 01_C Clause
	N2 F2_Def NumN or NNum can have a DEM?
	N3 01_ Dem A N
	N3 07_Dem Num N
	O 01 1_Indef Mass_Can be bare
	O 02 3_Def_Mass _Must have an article
	O 04 3_Def_Sg_Must have an article
	O 06 3_Def_Pl_Must have an article
	Q06_Polar question by Aux-fronting
	Q08_Affirmative answer by particle
	Q16_NEGA_Negative answer by special neg particle
	Danish
	21_Pron.Poss N
	C 01_C Clause
	N2 F2_Def NumN or NNum can have a DEM?
	N3 01_ Dem A N
	N3 07_Dem Num N
	O 01 1_Indef Mass_Can be bare
	O 02 3_Def_Mass _Must have an article
	O 04 3_Def_Sg_Must have an article
	O 06 3_Def_Pl_Must have an article
	Q06_Polar question by Aux-fronting
	Q08_Affirmative answer by particle
	Q16_NEGA_Negative answer by special neg particle
	Danish
	21_Pron.Poss N
	C 01_C Clause
	N2 F2_Def NumN or NNum can have a DEM?
	N3 01_ Dem A N
	N3 07_Dem Num N
	O 01 1_Indef Mass_Can be bare
	O 02 3_Def_Mass _Must have an article
	O 04 3_Def_Sg_Must have an article
	O 06 3_Def_Pl_Must have an article
	Q06_Polar question by Aux-fronting
	Q08_Affirmative answer by particle
	Q16_NEGA_Negative answer by special neg particle
	Danish
	21_Pron.Poss N
	C 01_C Clause
	N2 F2_Def NumN or NNum can have a DEM?
	N3 01_ Dem A N
	N3 07_Dem Num N
	O 01 1_Indef Mass_Can be bare
	O 02 3_Def_Mass _Must have an article
	O 04 3_Def_Sg_Must have an article
	O 06 3_Def_Pl_Must have an article
	Q06_Polar question by Aux-fronting
	Q08_Affirmative answer by particle
	Q16_NEGA_Negative answer by special neg particle
	Danish
	21_Pron.Poss N
	C 01_C Clause
	N2 F2_Def NumN or NNum can have a DEM?
	N3 01_ Dem A N
	N3 07_Dem Num N
	O 01 1_Indef Mass_Can be bare
	O 02 3_Def_Mass _Must have an article
	O 04 3_Def_Sg_Must have an article
	O 06 3_Def_Pl_Must have an article
	Q06_Polar question by Aux-fronting
	Q08_Affirmative answer by particle
	Q16_NEGA_Negative answer by special neg particle
	Danish
	21_Pron.Poss N
	C 01_C Clause
	N2 F2_Def NumN or NNum can have a DEM?
	N3 01_ Dem A N
	N3 07_Dem Num N
	O 01 1_Indef Mass_Can be bare
	O 02 3_Def_Mass _Must have an article
	O 04 3_Def_Sg_Must have an article
	O 06 3_Def_Pl_Must have an article
	Q06_Polar question by Aux-fronting
	Q08_Affirmative answer by particle
	Q16_NEGA_Negative answer by special neg particle
	Danish
	21_Pron.Poss N
	C 01_C Clause
	N2 F2_Def NumN or NNum can have a DEM?
	N3 01_ Dem A N
	N3 07_Dem Num N
	O 01 1_Indef Mass_Can be bare
	O 02 3_Def_Mass _Must have an article
	O 04 3_Def_Sg_Must have an article
	O 06 3_Def_Pl_Must have an article
	Q06_Polar question by Aux-fronting
	Q08_Affirmative answer by particle
	Q16_NEGA_Negative answer by special neg particle
	Danish
	21_Pron.Poss N
	C 01_C Clause
	N2 F2_Def NumN or NNum can have a DEM?
	N3 01_ Dem A N
	N3 07_Dem Num N
	O 01 1_Indef Mass_Can be bare
	O 02 3_Def_Mass _Must have an article
	O 04 3_Def_Sg_Must have an article
	O 06 3_Def_Pl_Must have an article
	Q06_Polar question by Aux-fronting
	Q08_Affirmative answer by particle
	Q16_NEGA_Negative answer by special neg particle
	Danish
	21_Pron.Poss N
	C 01_C Clause
	N2 F2_Def NumN or NNum can have a DEM?
	N3 01_ Dem A N
	N3 07_Dem Num N
	O 01 1_Indef Mass_Can be bare
	O 02 3_Def_Mass _Must have an article
	O 04 3_Def_Sg_Must have an article
	O 06 3_Def_Pl_Must have an article
	Q06_Polar question by Aux-fronting
	Q08_Affirmative answer by particle
	Q16_NEGA_Negative answer by special neg particle
	Danish
	21_Pron.Poss N
	C 01_C Clause
	N2 F2_Def NumN or NNum can have a DEM?
	N3 01_ Dem A N
	N3 07_Dem Num N
	O 01 1_Indef Mass_Can be bare
	O 02 3_Def_Mass _Must have an article
	O 04 3_Def_Sg_Must have an article
	O 06 3_Def_Pl_Must have an article
	Q06_Polar question by Aux-fronting
	Q08_Affirmative answer by particle
	Q16_NEGA_Negative answer by special neg particle
	Danish
	21_Pron.Poss N
	C 01_C Clause
	N2 F2_Def NumN or NNum can have a DEM?
	N3 01_ Dem A N
	N3 07_Dem Num N
	O 01 1_Indef Mass_Can be bare
	O 02 3_Def_Mass _Must have an article
	O 04 3_Def_Sg_Must have an article
	O 06 3_Def_Pl_Must have an article
	Q06_Polar question by Aux-fronting
	Q08_Affirmative answer by particle
	Q16_NEGA_Negative answer by special neg particle
	Danish
	21_Pron.Poss N
	C 01_C Clause
	N2 F2_Def NumN or NNum can have a DEM?
	N3 01_ Dem A N
	N3 07_Dem Num N
	O 01 1_Indef Mass_Can be bare
	O 02 3_Def_Mass _Must have an article
	O 04 3_Def_Sg_Must have an article
	O 06 3_Def_Pl_Must have an article
	Q06_Polar question by Aux-fronting
	Q08_Affirmative answer by particle
	Q16_NEGA_Negative answer by special neg particle
	Danish
	21_Pron.Poss N
	C 01_C Clause
	N2 F2_Def NumN or NNum can have a DEM?
	N3 01_ Dem A N
	N3 07_Dem Num N
	O 01 1_Indef Mass_Can be bare
	O 02 3_Def_Mass _Must have an article
	O 04 3_Def_Sg_Must have an article
	O 06 3_Def_Pl_Must have an article
	Q06_Polar question by Aux-fronting
	Q08_Affirmative answer by particle
	Q16_NEGA_Negative answer by special neg particle
	Danish
	21_Pron.Poss N
	C 01_C Clause
	N2 F2_Def NumN or NNum can have a DEM?
	N3 01_ Dem A N
	N3 07_Dem Num N
	O 01 1_Indef Mass_Can be bare
	O 02 3_Def_Mass _Must have an article
	O 04 3_Def_Sg_Must have an article
	O 06 3_Def_Pl_Must have an article
	Q06_Polar question by Aux-fronting
	Q08_Affirmative answer by particle
	Q16_NEGA_Negative answer by special neg particle
	Danish
	21_Pron.Poss N
	C 01_C Clause
	N2 F2_Def NumN or NNum can have a DEM?
	N3 01_ Dem A N
	N3 07_Dem Num N
	O 01 1_Indef Mass_Can be bare
	O 02 3_Def_Mass _Must have an article
	O 04 3_Def_Sg_Must have an article
	O 06 3_Def_Pl_Must have an article
	Q06_Polar question by Aux-fronting
	Q08_Affirmative answer by particle
	Q16_NEGA_Negative answer by special neg particle
	Danish
	21_Pron.Poss N
	C 01_C Clause
	N2 F2_Def NumN or NNum can have a DEM?
	N3 01_ Dem A N
	N3 07_Dem Num N
	O 01 1_Indef Mass_Can be bare
	O 02 3_Def_Mass _Must have an article
	O 04 3_Def_Sg_Must have an article
	O 06 3_Def_Pl_Must have an article
	Q06_Polar question by Aux-fronting
	Q08_Affirmative answer by particle
	Q16_NEGA_Negative answer by special neg particle
	Danish
	21_Pron.Poss N
	C 01_C Clause
	N2 F2_Def NumN or NNum can have a DEM?
	N3 01_ Dem A N
	N3 07_Dem Num N
	O 01 1_Indef Mass_Can be bare
	O 02 3_Def_Mass _Must have an article
	O 04 3_Def_Sg_Must have an article
	O 06 3_Def_Pl_Must have an article
	Q06_Polar question by Aux-fronting
	Q08_Affirmative answer by particle
	Q16_NEGA_Negative answer by special neg particle
	Danish
	21_Pron.Poss N
	C 01_C Clause
	N2 F2_Def NumN or NNum can have a DEM?
	N3 01_ Dem A N
	N3 07_Dem Num N
	O 01 1_Indef Mass_Can be bare
	O 02 3_Def_Mass _Must have an article
	O 04 3_Def_Sg_Must have an article
	O 06 3_Def_Pl_Must have an article
	Q06_Polar question by Aux-fronting
	Q08_Affirmative answer by particle
	Q16_NEGA_Negative answer by special neg particle
	Danish
	21_Pron.Poss N
	C 01_C Clause
	N2 F2_Def NumN or NNum can have a DEM?
	N3 01_ Dem A N
	N3 07_Dem Num N
	O 01 1_Indef Mass_Can be bare
	O 02 3_Def_Mass _Must have an article
	O 04 3_Def_Sg_Must have an article
	O 06 3_Def_Pl_Must have an article
	Q06_Polar question by Aux-fronting
	Q08_Affirmative answer by particle
	Q16_NEGA_Negative answer by special neg particle
